# Supplementary material for: Artificial intelligence in medical education curriculum: An e-Delphi study for competencies
Source: PubMed Central journal article supplement (PMC9302857; doi:10.1371/journal.pone.0271872), 2022-07-21
Supplement: pone.0271872.s001.pdf [file pone.0271872.s001.pdf]

# S1 Appendix

## Occupation fields of the participants

| Occupation                                | Round        | Round        | Round        |
|-------------------------------------------|--------------|--------------|--------------|
|                                           | 1            | 2            | 3            |
|                                           | N (%)        |              |              |
| <b>Medical</b>                            | 43<br>(57.3) | 39<br>(56.5) | 35<br>(58.3) |
| Anesthesiology                            | 1            | 1            | -            |
| Biochemistry                              | 3            | 3            | 3            |
| Dentist                                   | 1            | 1            | 1            |
| Emergency Medicine                        | 1            | 1            | 1            |
| Family Medicine                           | 2            | 2            | 2            |
| Health Administration                     | 2            | 2            | 2            |
| Health Informatics                        | 1            | 1            | 1            |
| Medical Education                         | 2            | 2            | 2            |
| Medical Ethics                            | 2            | 2            | 2            |
| Medical Genetics                          | 2            | 2            | 2            |
| Medical Student                           | 3            | 3            | 3            |
| Neuroscience                              | 2            | 2            | 2            |
| Neurosurgery                              | 1            | -            | -            |
| Occupational Medicine                     | 1            | 1            | -            |
| Orthopedics                               | 1            | 1            | 1            |
| Pediatric Endocrinology                   | 1            | 1            | 1            |
| Pediatric Surgery                         | 1            | 1            | 1            |
| Public Health                             | 1            | 1            | 1            |
| Pulmonology                               | 1            | 1            | 1            |
| Radiology                                 | 9            | 7            | 5            |
| Surgery                                   | 4            | 3            | 3            |
| Urology                                   | 1            | 1            | 1            |
| <b>Non-medical</b>                        | 32<br>(42.7) | 30<br>(43.5) | 25<br>(41.7) |
| Bioinformatics                            | 1            | 1            | -            |
| Biomedical Engineering                    | 1            | 1            | -            |
| Computer Engineering                      | 10           | 10           | 10           |
| Econometrics                              | 1            | 1            | 1            |
| Educational Technologist                  | 3            | 3            | 3            |
| Electrical Engineering and Electronics    | 8            | 6            | 5            |
| Electronics and Communication Engineering | 1            | 1            | 1            |
| Finance                                   | 1            | 1            | -            |
| Informatics                               | 3            | 3            | 2            |
| Law                                       | 2            | 2            | 2            |
| Medical Engineering                       | 1            | 1            | 1            |
| <b>Total</b>                              | <b>75</b>    | <b>69</b>    | <b>60</b>    |
